# Supplementary material for: Unravelling the destabilization potential of ellagic acid on α-synuclein fibrils using molecular dynamics simulations
Source: Royal Society of Chemistry journal article supplement (doi:10.1039/d2cp06006j), 2023-01-01
Supplement: d2cp06006j1.pdf [file d2cp06006j1.pdf]

## Supporting Information

### Unravelling the destabilization potential of Ellagic acid on $\alpha$ -Synuclein fibrils using molecular dynamics simulations

Opinder Kaur Mankoo,<sup>[a]</sup> Anupamjeet Kaur,<sup>[a]#</sup> Deepti Goyal<sup>\*[b]</sup> and Bhupesh Goyal<sup>\*[c]</sup>

[a] Department of Chemistry, Faculty of Basic and Applied Sciences, Sri Guru Granth Sahib World University, Fatehgarh Sahib–140406, Punjab, India

[b] Department of Chemistry, DAV College, Sector 10, Chandigarh–160011, India

[c] School of Chemistry & Biochemistry, Thapar Institute of Engineering & Technology, Patiala–147004, Punjab, India

\*Corresponding author

Email address: [deeptig@iitbombay.org](mailto:deeptig@iitbombay.org); [bhupesh@iitbombay.org](mailto:bhupesh@iitbombay.org)

#Present address

National Institute of Immunology, Aruna Asaf Ali Marg, New Delhi–110067, India

## Table of contents

|                                                                                                                                                                                                                                                                                                                                                                     |     |
|---------------------------------------------------------------------------------------------------------------------------------------------------------------------------------------------------------------------------------------------------------------------------------------------------------------------------------------------------------------------|-----|
| <b>Figure S1:</b> The input conformation of $\alpha$ -Syn fibril and EA for the docking studies is shown in the left panel. The best-docked pose of EA with $\alpha$ -Syn fibril (right panel). The $\alpha$ -Syn fibril is shown in cartoon and EA is displayed in the stick representation.                                                                       | S3  |
| <b>Figure S2:</b> The top ten docked conformations of EA with $\alpha$ -Syn fibril.                                                                                                                                                                                                                                                                                 | S4  |
| <b>Figure S3:</b> The 2D interaction maps displaying hydrogen bonds and hydrophobic contacts in the top ten docked conformations of EA with $\alpha$ -Syn fibril. The green dashed line depicts hydrogen bonds between $\alpha$ -Syn fibril and EA.                                                                                                                 | S5  |
| <b>Figure S4:</b> The conformational snapshots of MD trajectory of $\alpha$ -Syn fibril at different time points in the absence and presence of EA are shown in panel a, and b, respectively.                                                                                                                                                                       | S6  |
| <b>sFigure S5:</b> The RMSD of $\alpha$ -Syn fibril alone (panel a) and $\alpha$ -Syn fibril + EA (panel b) as a function of simulation time for the repeat simulations with different initial velocities. The RMSF of the residues of $\alpha$ -Syn fibril in the absence and presence of EA for the repeat simulations are shown in panel c, and d, respectively. | S7  |
| <b>Figure S6:</b> The time-dependent evolution of number of contacts between $\alpha$ -Syn fibril and EA.                                                                                                                                                                                                                                                           | S8  |
| <b>Figure S7:</b> The 2D interaction map displaying the hydrophobic contacts and hydrogen bonds in the representative conformations of the three most-populated conformational clusters C1', C2' and C3' of $\alpha$ -Syn fibril + EA are displayed in panel a, b, and c, respectively.                                                                             | S9  |
| <b>Figure S8:</b> The RMSD of chain H and chain J of $\alpha$ -Syn fibril in the absence and presence of EA during simulation are shown in panel a, and b, respectively.                                                                                                                                                                                            | S10 |

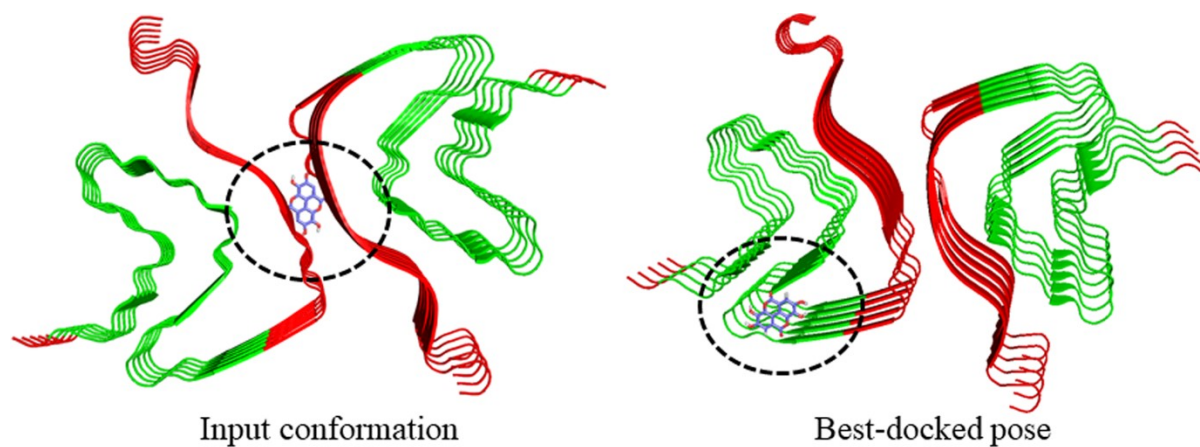

**Figure S1:** The input conformation of  $\alpha$ -Syn fibril and EA for the docking studies is shown in the left panel. The best-docked pose of EA with  $\alpha$ -Syn fibril (right panel). The  $\alpha$ -Syn fibril is shown in cartoon and EA is displayed in the stick representation.

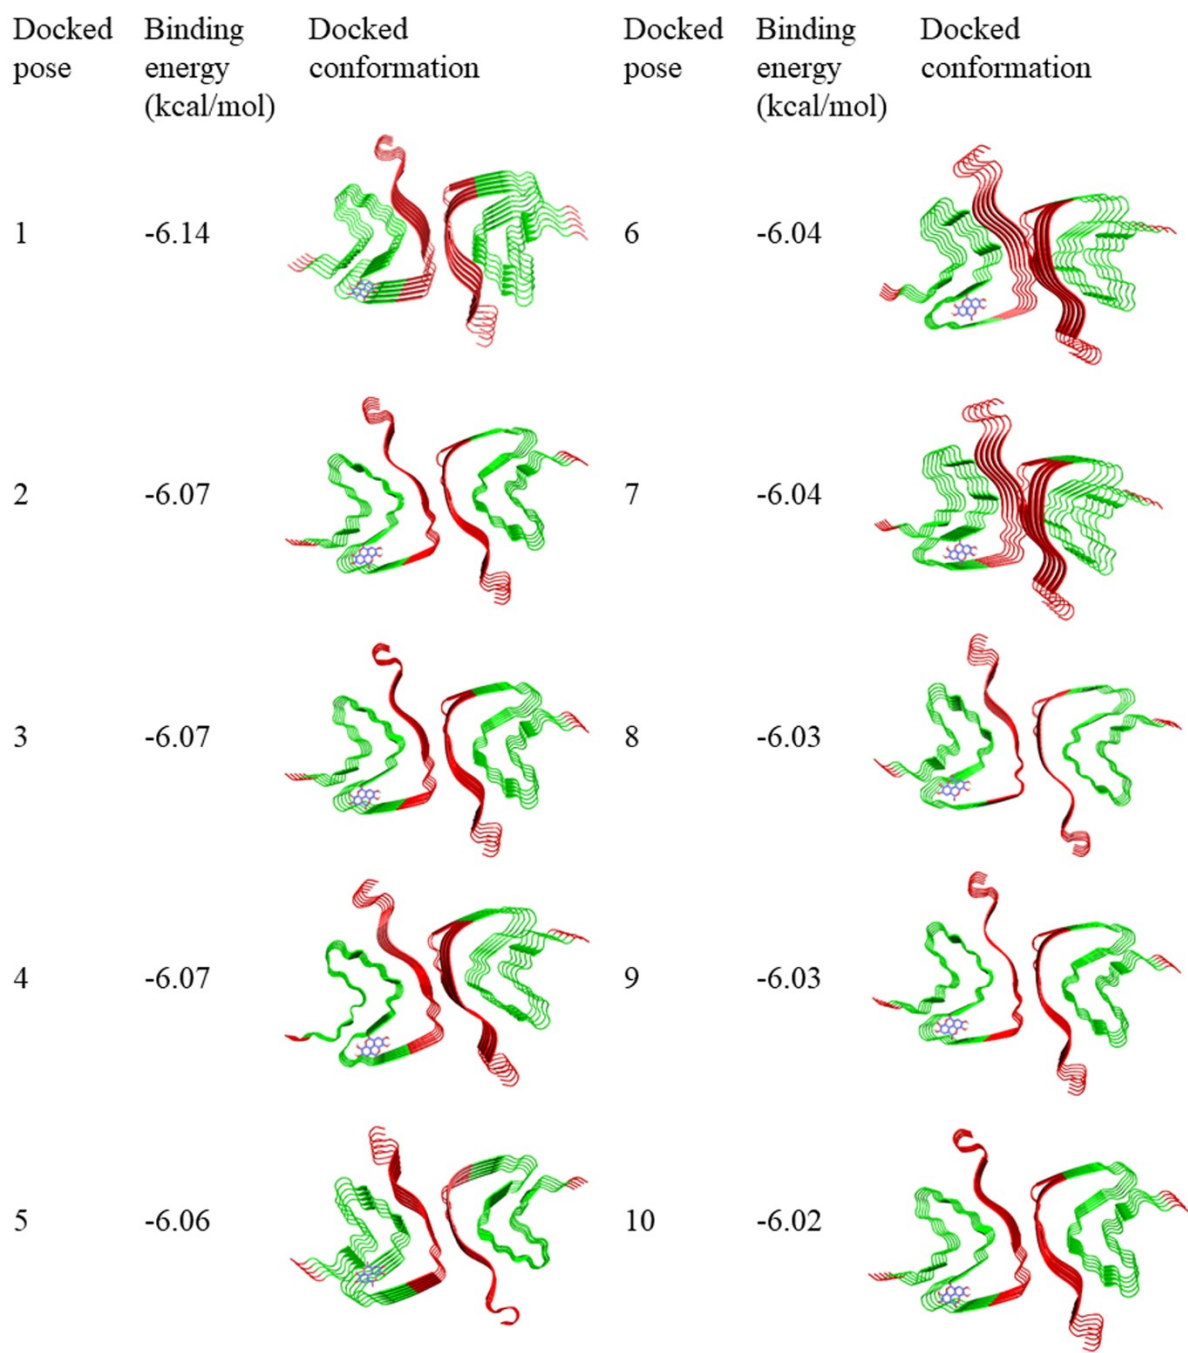

**Figure S2:** The top ten docked conformations of EA with  $\alpha$ -Syn fibril.

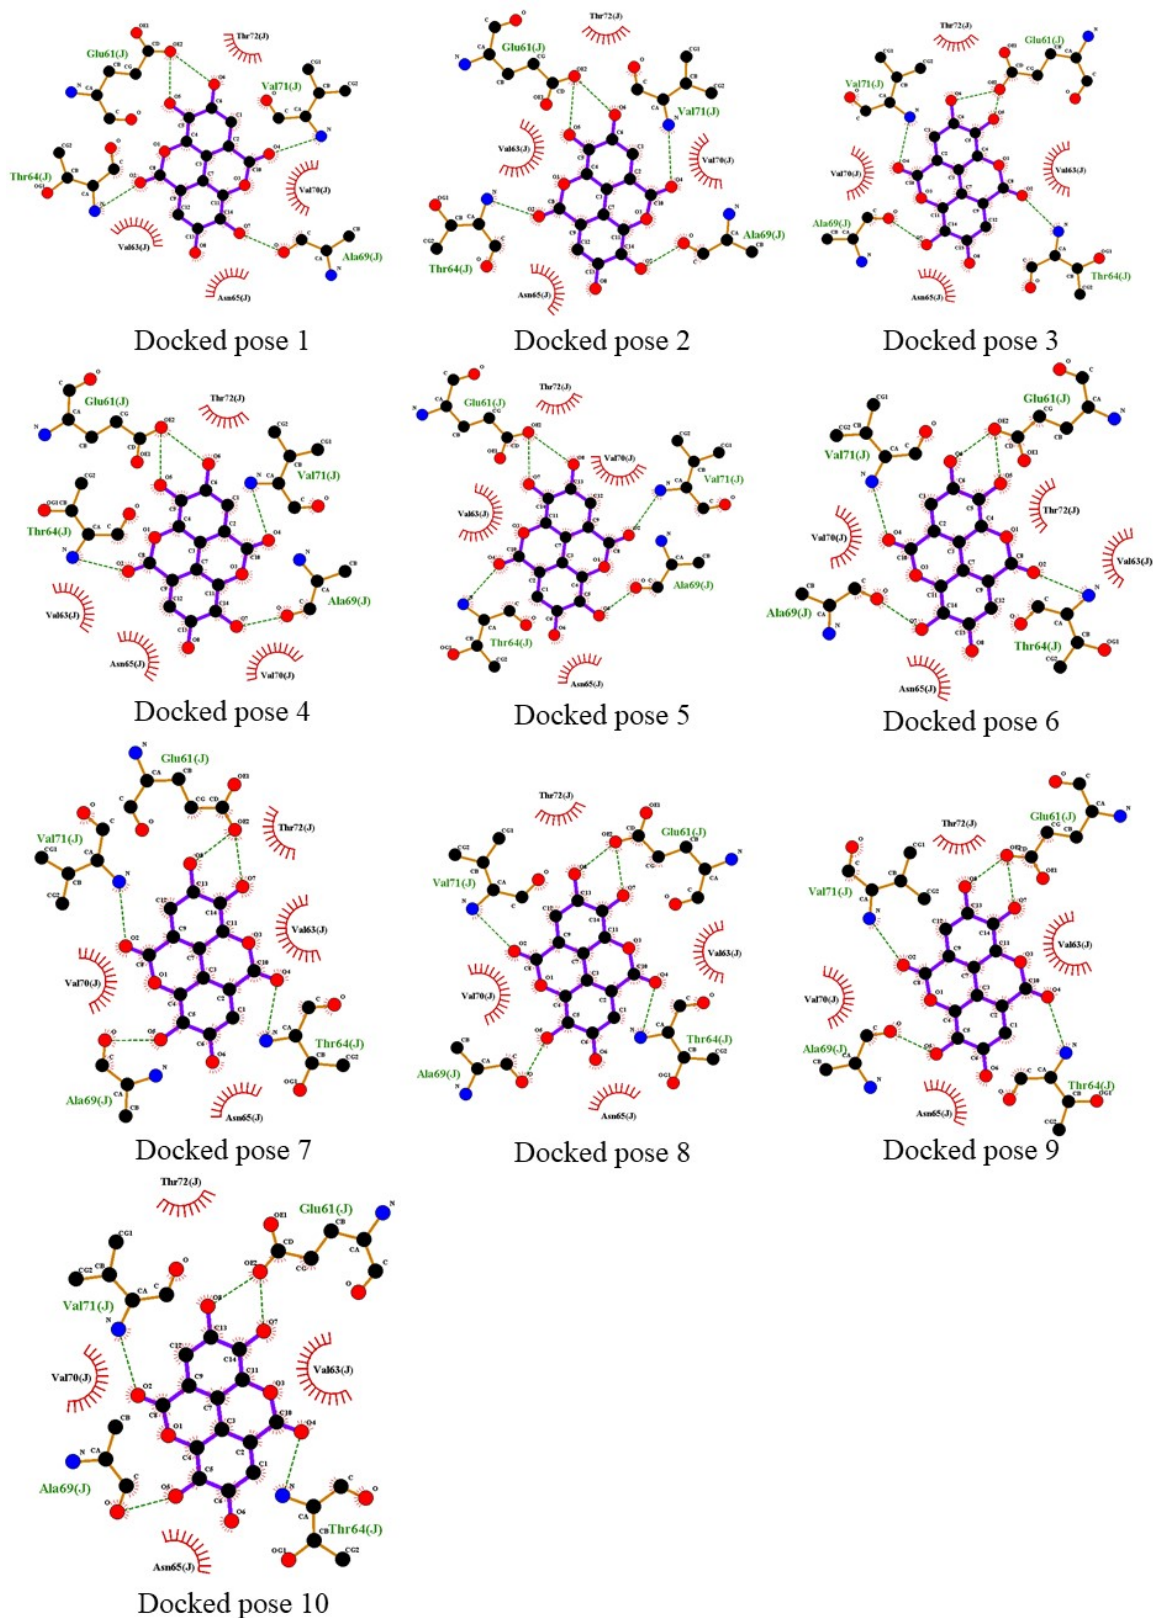

**Figure S3:** The 2D interaction maps displaying hydrogen bonds and hydrophobic contacts in the top ten docked conformations of EA with  $\alpha$ -Syn fibril. The green dashed line depicts hydrogen bonds between  $\alpha$ -Syn fibril and EA.

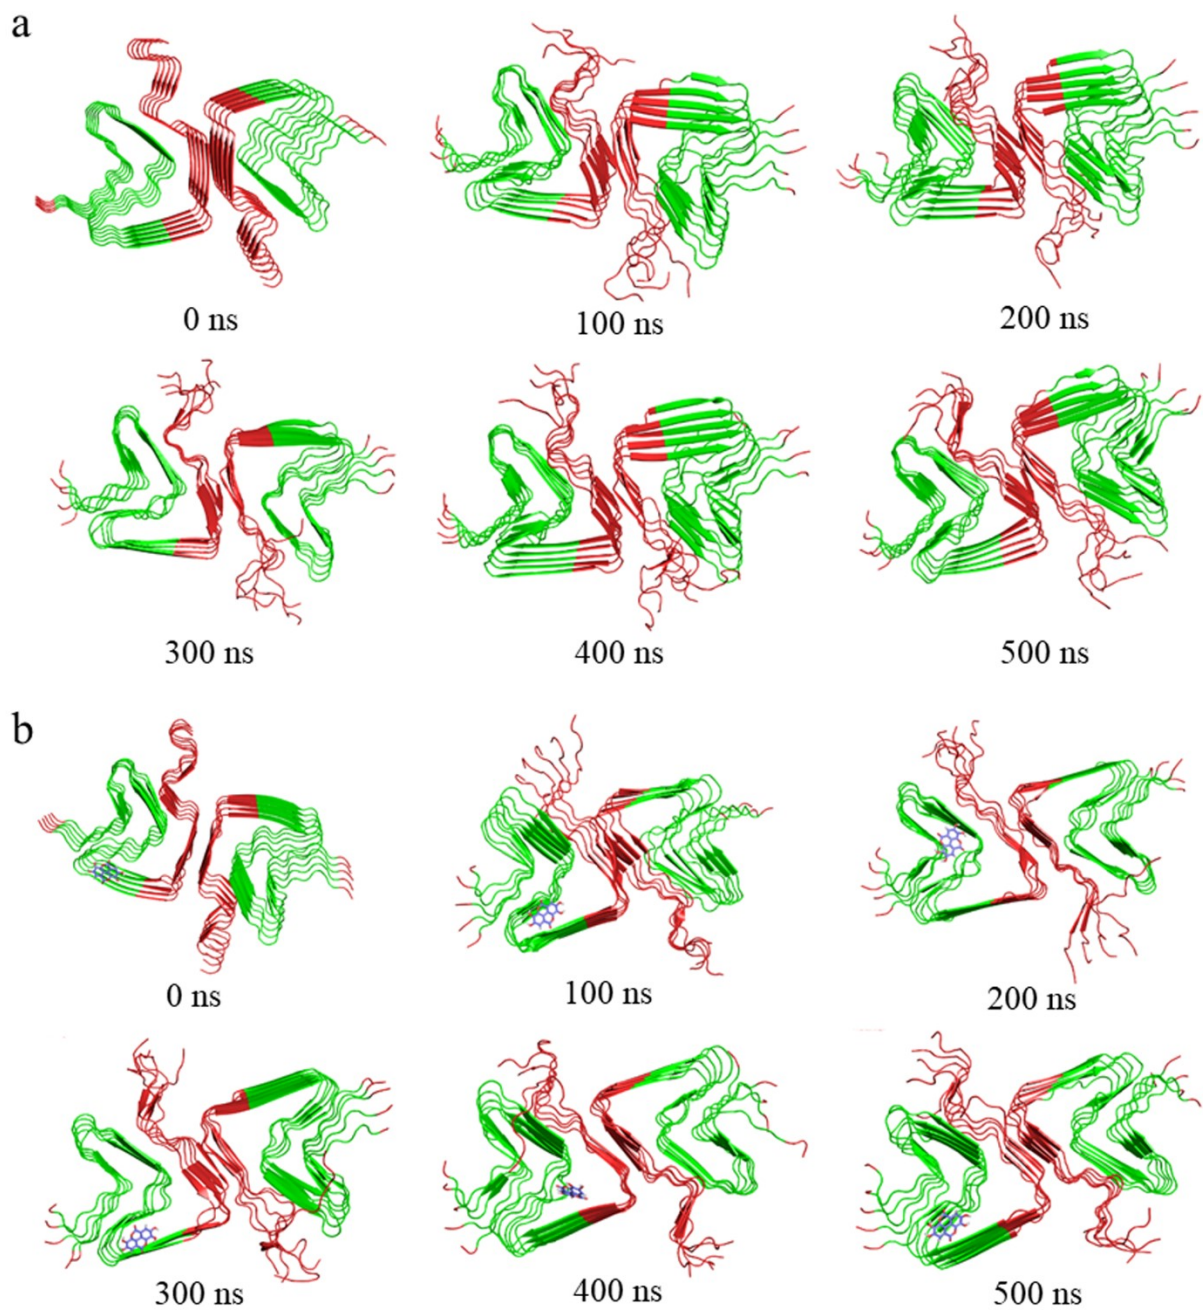

**Figure S4:** The conformational snapshots of MD trajectory of  $\alpha$ -Syn fibril at different time points in the absence and presence of EA are shown in panel a, and b, respectively.

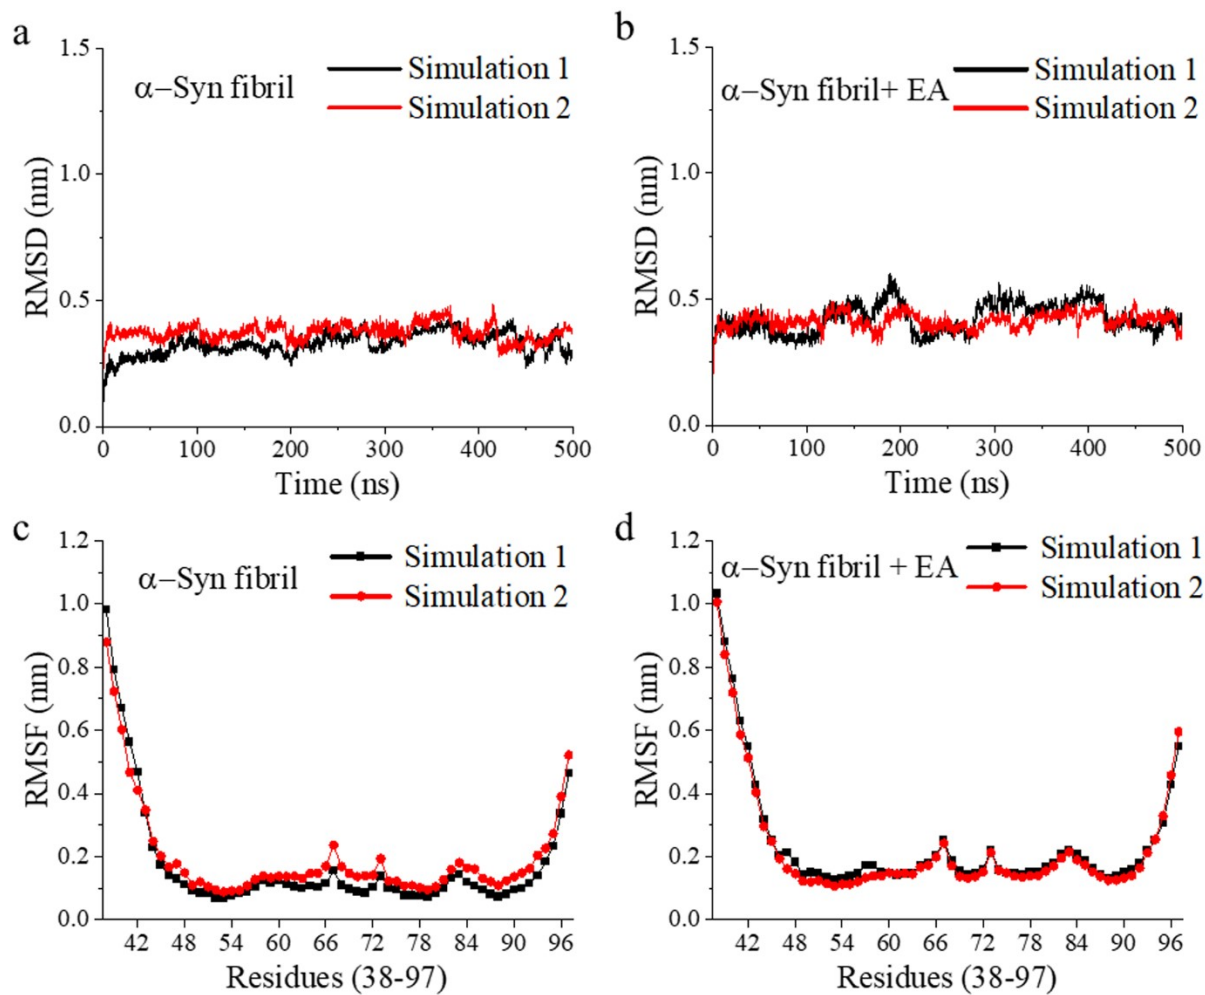

**Figure S5:** The RMSD of  $\alpha$ -Syn fibril alone (panel a) and  $\alpha$ -Syn fibril + EA (panel b) as a function of simulation time for the repeat simulations with different initial velocities. The RMSF of the residues of  $\alpha$ -Syn fibril in the absence and presence of EA for the repeat simulations are shown in panel c, and d, respectively.

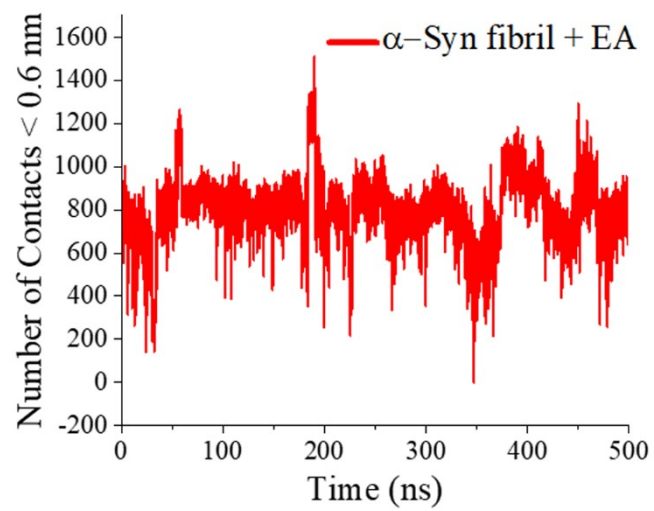

**Figure S6:** The time-dependent evolution of number of contacts between  $\alpha$ -Syn fibril and EA.



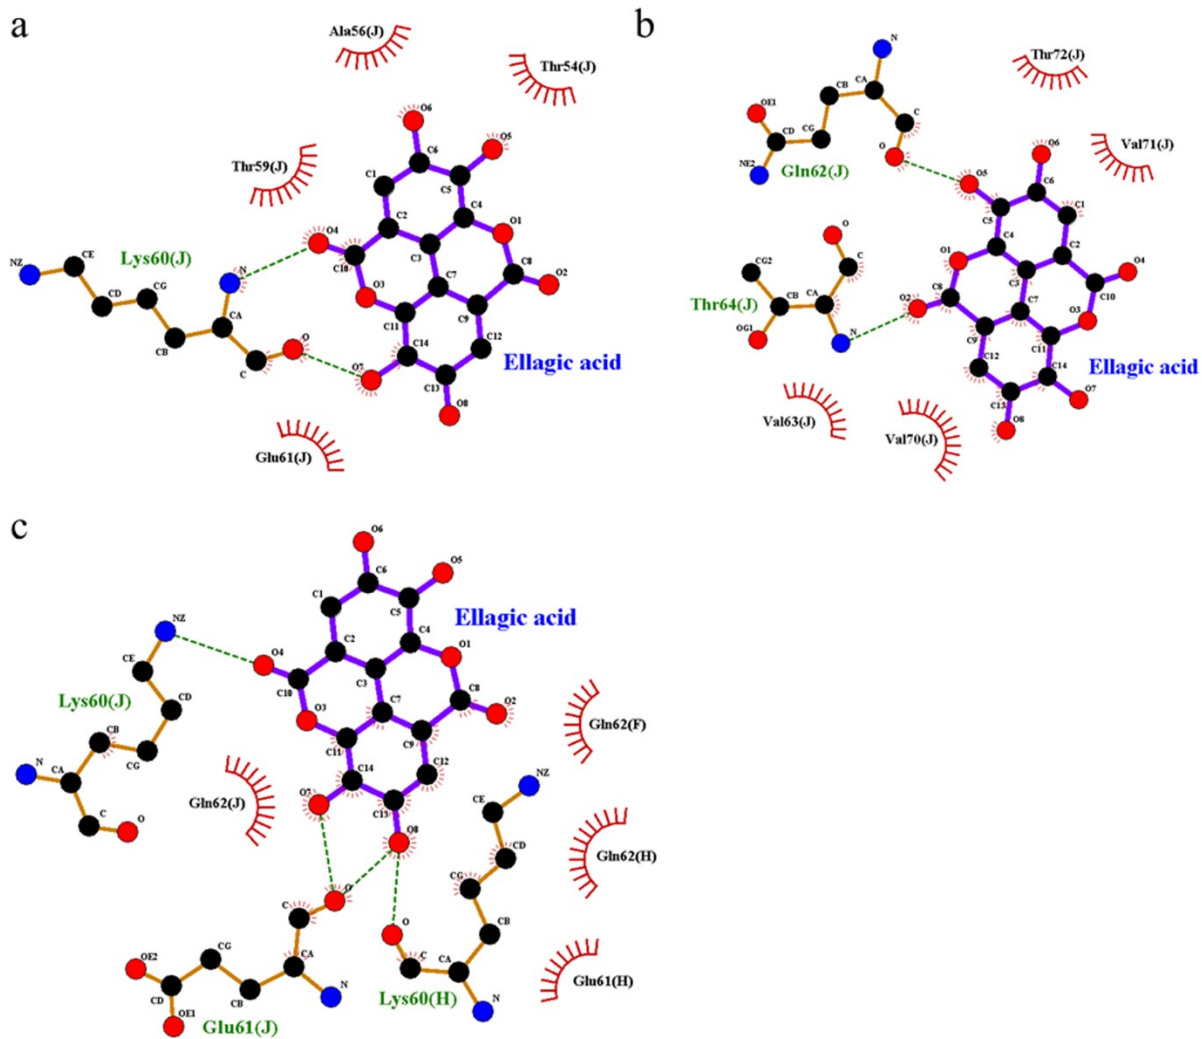

**Figure S7:** The 2D interaction map displaying the hydrophobic contacts and hydrogen bonds in the representative conformations of the three most-populated conformational clusters C1', C2' and C3' of  $\alpha$ -Syn fibril + EA are displayed in panel a, b, and c, respectively.

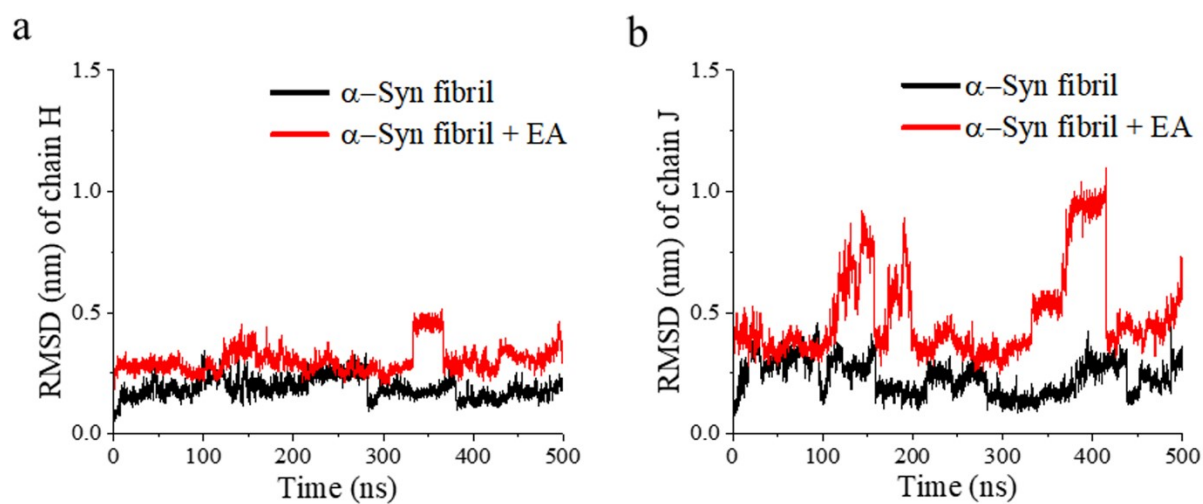

**Figure S8:** The RMSD of chain H and chain J of  $\alpha$ -Syn fibril in the absence and presence of EA during simulation are shown in panel a, and b, respectively.
